# Supplementary material for: Sensitive detection of antibiotics using aptamer conformation cooperated enzyme-assisted SERS technology
Source: Royal Society of Chemistry journal article supplement (doi:10.1039/c9an00190e), 2019-01-01
Supplement: c9an00190e1.pdf [file c9an00190e1.pdf]

## Supporting Information

### Sensitive Detection of Antibiotics using Aptamer Conformation Cooperated Enzyme-assisted SERS Technology

Qianqian Fang, Yingying Li, Xinxing Miao, Yiqiu Zhang, Jun Yan, Tainrong Yu, Jian Liu\*

Institute of Functional Nano and Soft Materials (FUNSOM), Jiangsu Key Laboratory for Carbon-Based Functional Materials and Devices, Soochow University, Suzhou, Jiangsu, 215123, China

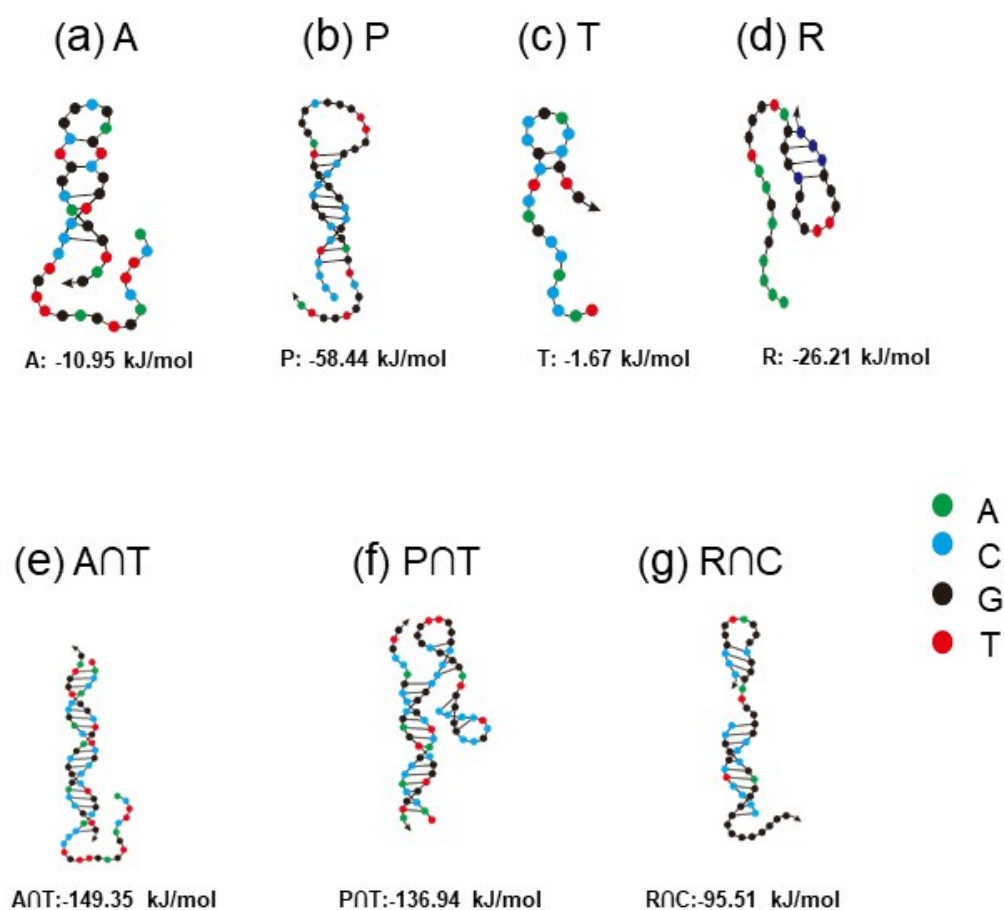

**Figure S1.** Minimum free energy (MFE) structures of different oligos and oligo hybridization with annotation of free energy calculated by NUPACK.

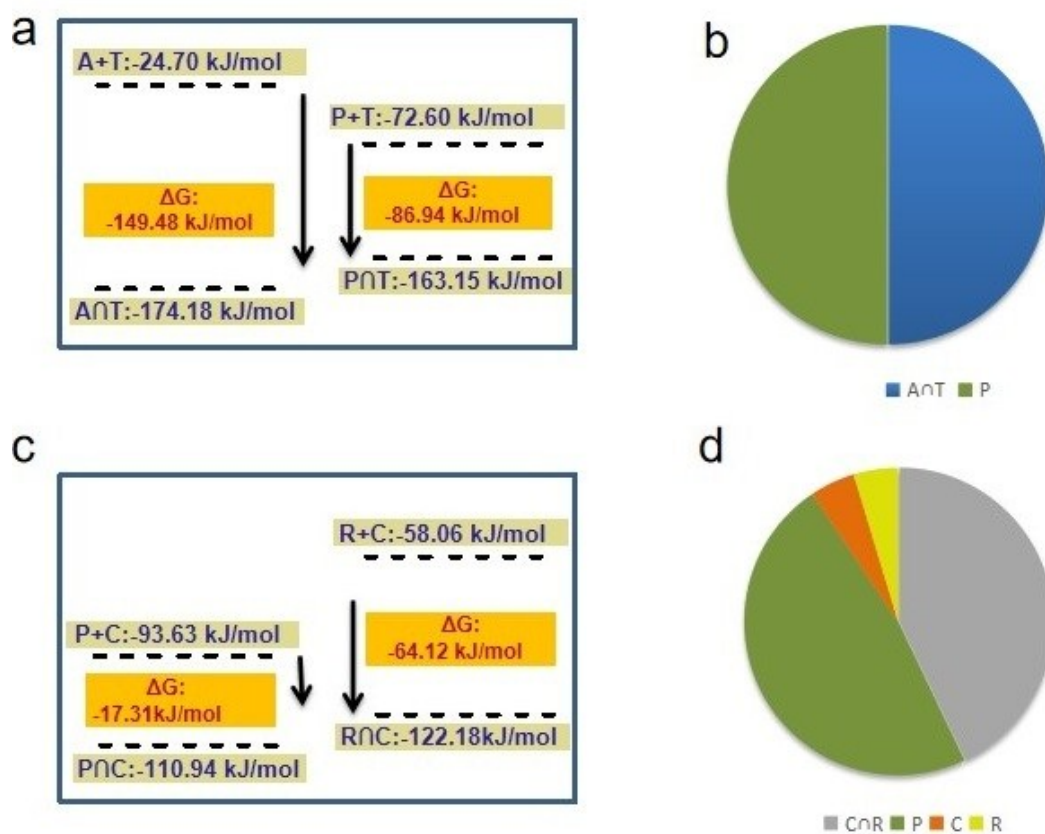

**Figure S2.** Theoretical calculations of the energy changes for the competitive hybridizations between DNA oligos. (a-b) Gibbs free energy changes and the calculated efficiencies for hybridization in silica: AΠT or PΠT. (c-d) Gibbs free energy changes and the calculated efficiencies for hybridization in silica: PΠC or RΠC. Π symbols hybridization of the oligos. (The temperature at 25 °C)

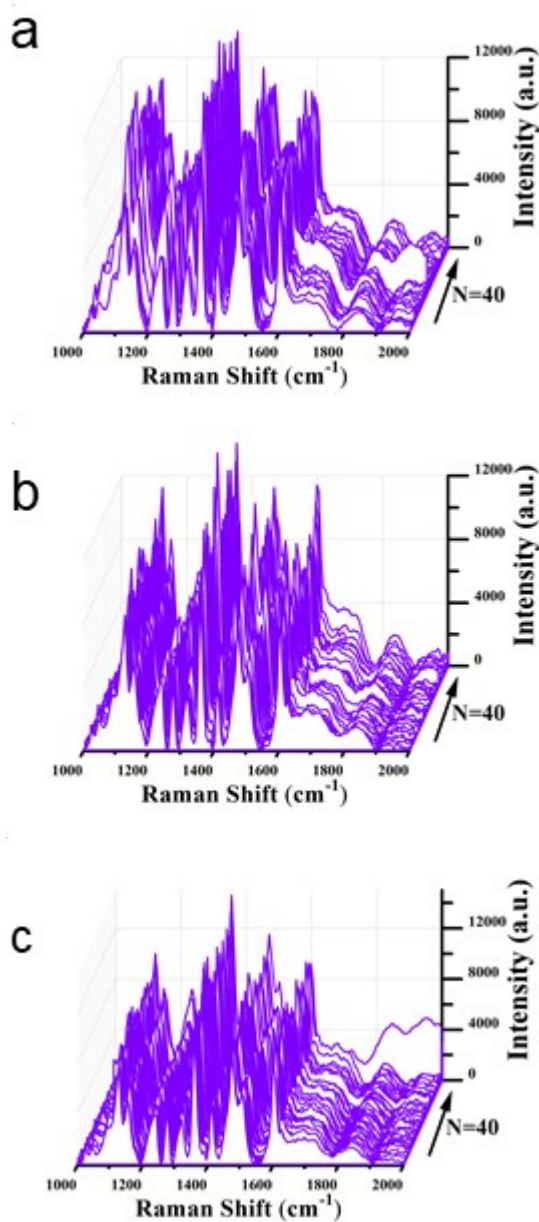

**Figure S3.** SERS spectra of Cy5 (1  $\mu\text{M}$ ) collected from 40 random spots of additional three separate Au NPs@Si substrates. Baseline correction was made for individual spectrum primarily using the software built-in function of automatic adjustment. The occasional issue of baseline over-processing may require manual adjustment for correction.

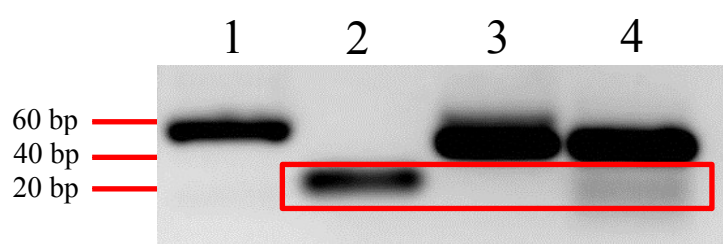

**Figure S4** Gel electrophoresis validation of the ACCESS assay including both the first step of aptamer-CAP recognition-induced releasing and the second step of enzymatic cleavage in a single-tube experiment. 1: P+T; 2: R; 3: A+T+P+Exo III; 4: A+T+CAP+P+Exo III. GelRed nucleic acid stain used in the experiment. The red rectangle drawn as a visual guide for comparison of the band position.

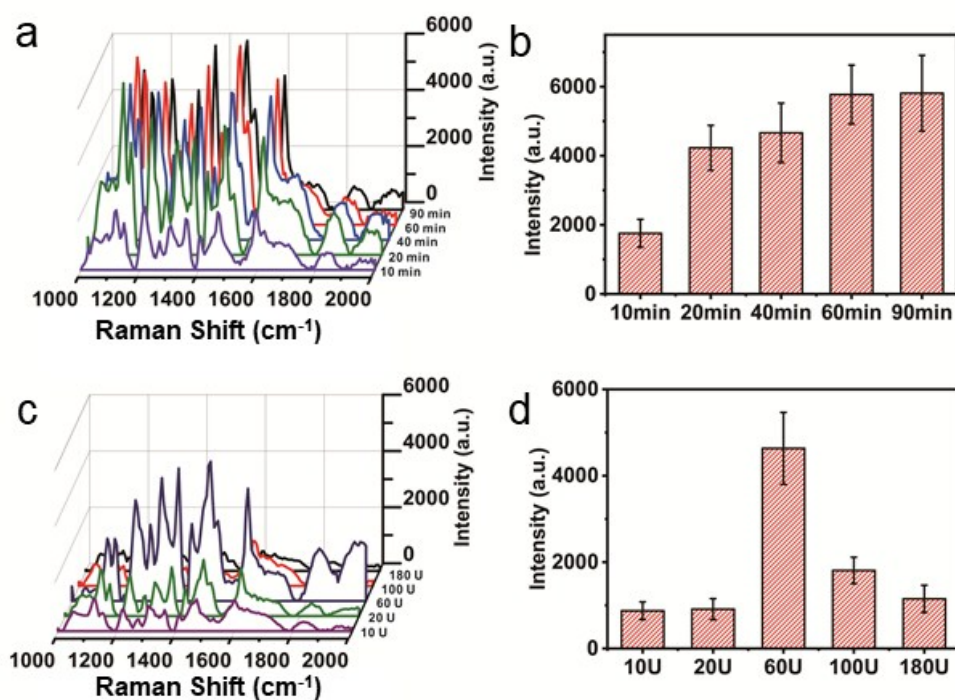

**Figure S5.** Optimization of the incubation time and Exo III enzyme concentration in the cleavage reaction. (a-b) SERS spectra and intensity quantification at 1366 cm<sup>-1</sup> peak in the titration experiments of the enzyme incubation time. (c-d) SERS spectra and intensity quantification at 1366 cm<sup>-1</sup> peak in the titration experiments of the enzyme concentration. Error bar: standard deviation (n = 3). Baseline correction was made for individual spectrum primarily using the software built-in function of automatic adjustment.

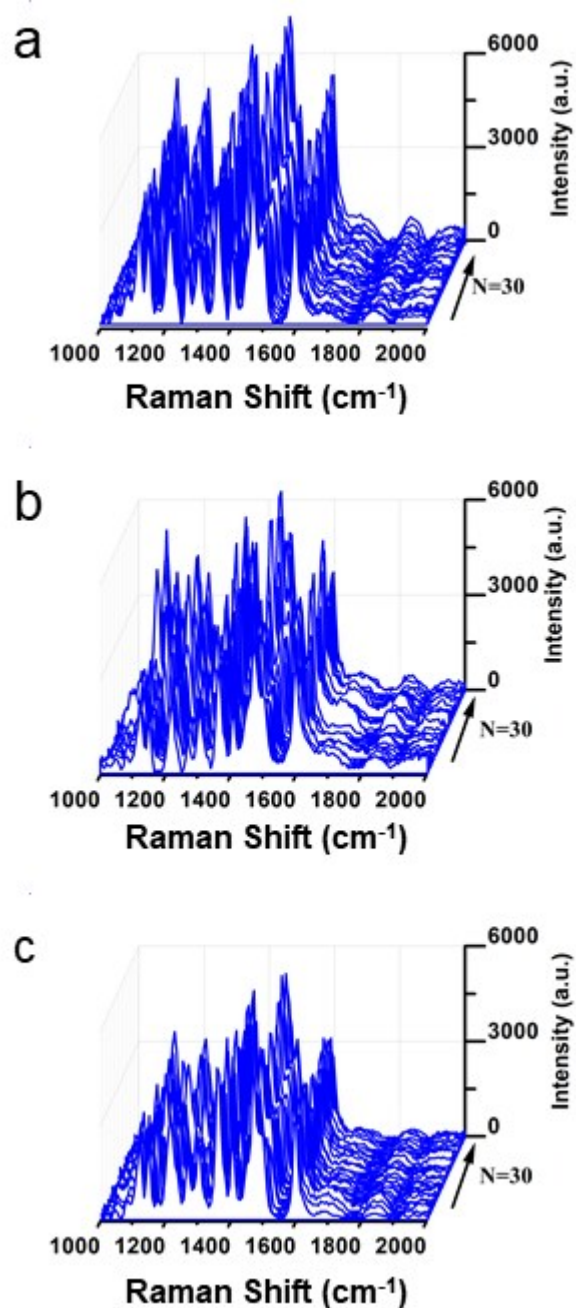

**Figure S6.** SERS spectra of CAP (150 pM) collected from 30 random spots of three identical Au NPs@Si substrates. Baseline correction was made for individual spectrum primarily using the software built-in function of automatic adjustment. The occasional issue of baseline over-processing may require manual adjustment for correction.

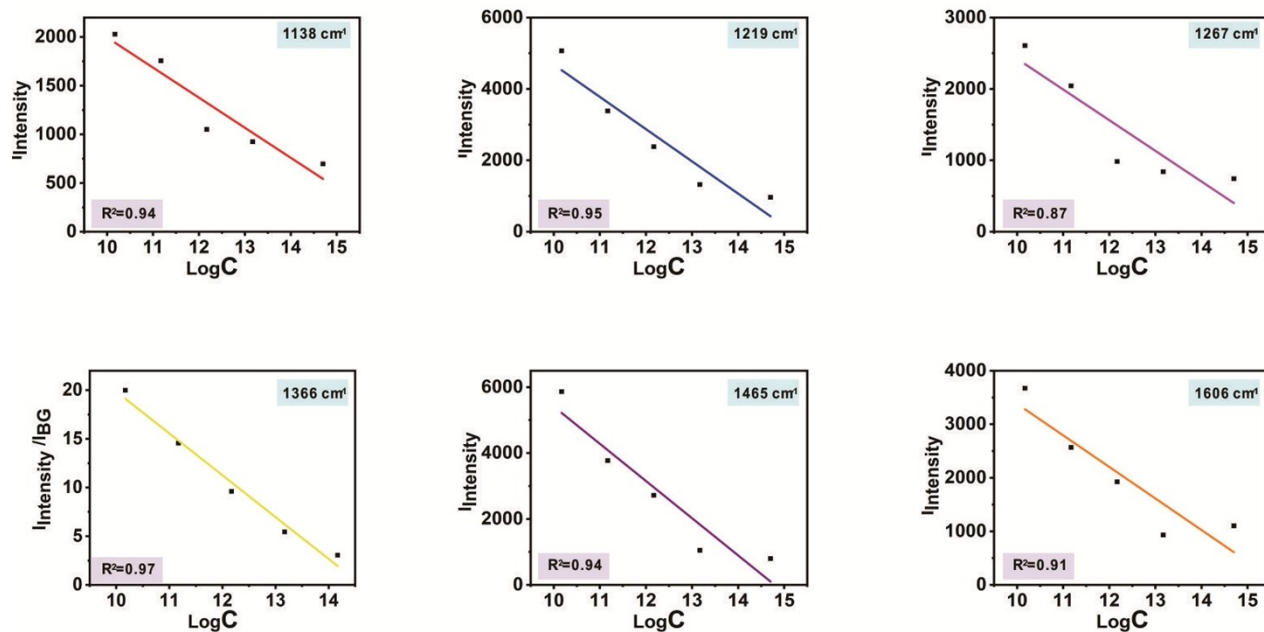

**Figure S7.** Raman intensities of the characteristic SERS peaks at 1138, 1219, 1267, 1366, 1465 and 1606 cm<sup>-1</sup> with logarithmic CAP concentrations in water.

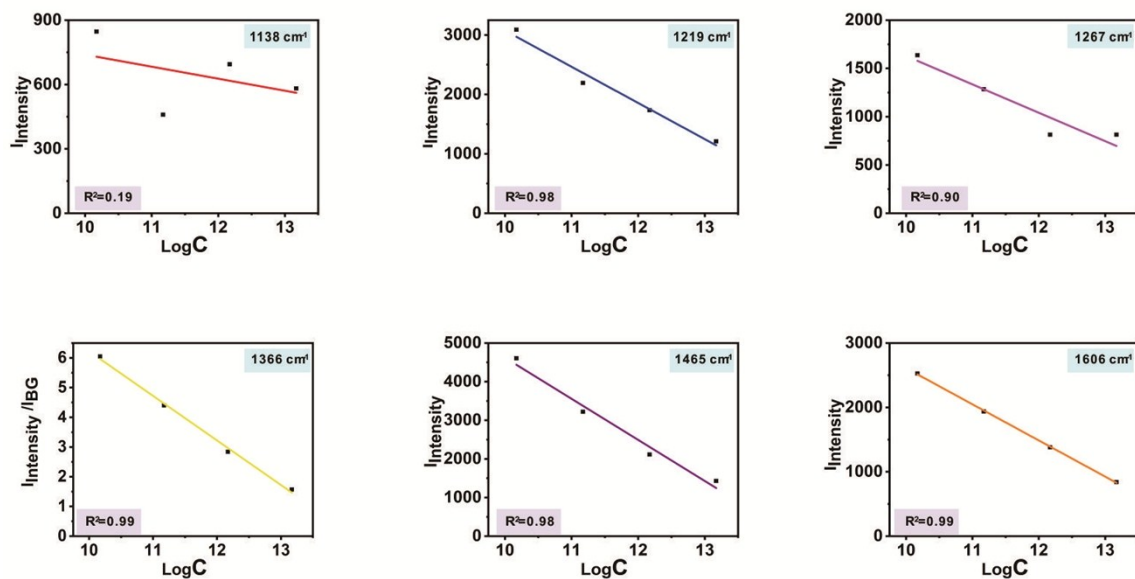

**Figure S8.** Raman intensities of the characteristic SERS peaks at 1138, 1219, 1267, 1366, 1465 and 1606  $\text{cm}^{-1}$  with logarithmic CAP concentrations in milk.

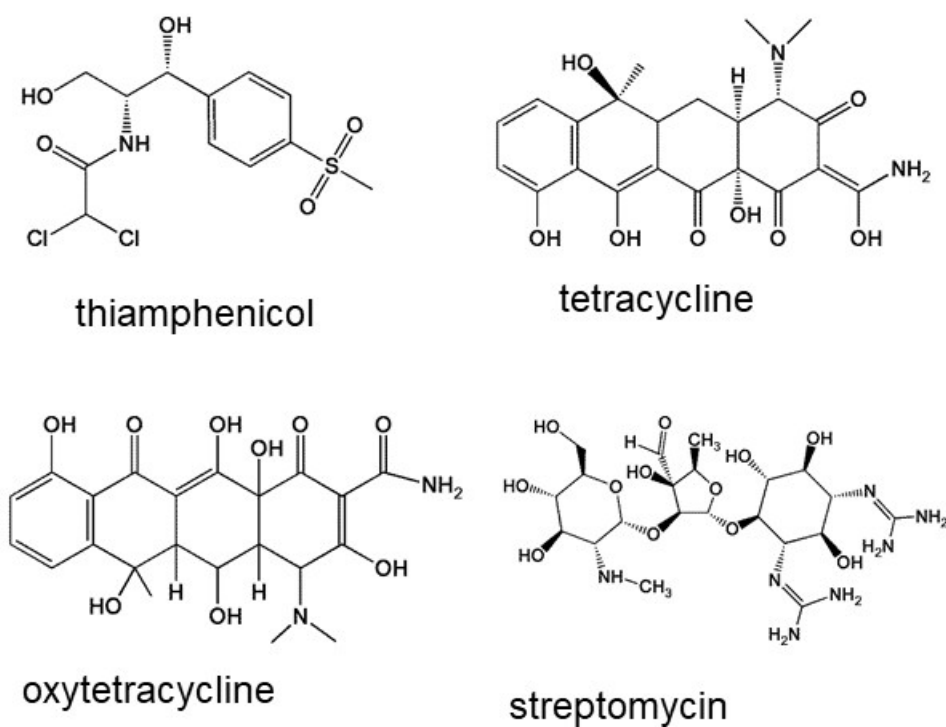

**Figure S9.** The chemical structures of different antibiotics, including thiamphenicol (TAP); tetracycline (TE); OT:oxytetracycline (OT); S:streptomycin (S).

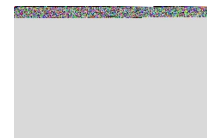**Table 1. The sequences of DNA oligos**

| <b>DNA</b> | <b>Sequences (5' → 3')</b>                     |
|------------|------------------------------------------------|
| Probe      | CCCCTCGCCGGGGTAGGGCGGGTTGGGCCCCGGCGAGTCGGTGGTA |
| Capture    | CCGGCGAGGGGCGGGCGGG                            |
| Target     | TACCACCGACTCGCCGACCGTG                         |
| Residue    | CCCCTCGCCGGGGTAGGGCGGGTTGGGCCC                 |
| Aptamer    | ACTTCAGTGAGTTGTCCACGGTCGGCGAGTCGGTGGTAG        |

**Table 2. Performance comparison of different assays for CAP detection**

| <b>Assay principle</b>                  | <b>LOD</b> | <b>Linear Range</b> | <b>Reference</b> |
|-----------------------------------------|------------|---------------------|------------------|
| SERS                                    | 310 nM     | 310 nM-15.5 pM      | 46               |
| Aptamer + Realtime q-PCR                | 3.1 nM     | 3.1 nM-62 nM        | 10               |
| Surface plasmon resonance               | 164 nM     | N/A                 | 47               |
| Chemiluminescent Immunoassay            | 0.25 nM    | 3.1 pM-31 pM        | 48               |
| Electrochemical sensor                  | 2.9 nM     | 10 nM-1000nM        | 19               |
| Photoresponsive colormetric immunoassay | 0.03 nM    | 0.03 nM-12.5 nM     | 15               |
| Our work                                | 15 fM      | 15 fM - 150 pM      |                  |
